# Supplementary material for: A fully integrated nucleic acid analysis system for multiplex detection of genetic polymorphisms related to folic acid metabolism
Source: Royal Society of Chemistry journal article supplement (doi:10.1039/d2lc01169g), 2023-01-01
Supplement: d2lc01169g1.pdf [file d2lc01169g1.pdf]

## Supplementary materials for

# A fully integrated nucleic acid analysis system for multiplex detection of genetic polymorphisms related to folic acid metabolism

**This supplementary PDF file includes the following information:**

- Table S1. List of primer sequences used.
- Figure S1. Representation of the microfluidic cassette.
- Figure S2. The production process of the DS tape.
- Figure S3. Modules for the nucleic acid analyzer.
- Figure S4. Schematic diagram of the fluid operation process of the cassette.
- Figure S5. Schematic diagram of the fluid for nucleic acid extraction with a silica membrane.
- Figure S6. Pre-embedding of primers on amplification chips in cross-contamination experiments.
- Figure S7. Sequences and design principles of the primers used for detecting single nucleotide polymorphisms of genes in folate metabolism.
- Figure S8. qPCR and sequencing results of the 5 clinical samples.

**Other Supplementary Material for this manuscript includes the following:**

- Video. S1. Working principle of the microfluidic cassette.

**Table S1.** List of primer sequences

| Target             | Primer | Sequences (5'-3')                                   |
|--------------------|--------|-----------------------------------------------------|
| λ-DNA<br>(LAMP)    | F3     | ATACAAAAACACCAGTGTAGG                               |
|                    | B3     | GCCGCCAGTTTGTTTCAG                                  |
|                    | FIP    | CGTTGAGATTTGCGAAGTACCAAGAATCAAATATGCTGCAAA<br>TGTG  |
|                    | BIP    | CAAACGCATAATAAGCAGGTGATTTTCGGAGGTGATGTTTTTCG<br>GTC |
|                    | Loop F | TGCCCCGGCCATC                                       |
|                    | Loop B | ATCATATCGTTCGGCT                                    |
| λ-DNA<br>(PCR)     | F      | CAAGCTTTGCCACACCACGGTATT                            |
|                    | R      | TAAGCACGAACTCAGCCAGAACGA                            |
| MTHFR677<br>(PCR)  | F-W    | GCTGCGTGATGATGAAATCGG                               |
|                    | F-M    | GCTGCGTGATGATGAAATCGA                               |
|                    | R      | GACTGTCATCCCTATTGGCA                                |
|                    | P      | FAM-CCTTCTCCTTCAAGTGCTTCAGGT-BHQ1                   |
| MTHFR1298<br>(PCR) | F-W    | GAACGAAGACTTCAAAGACACTTT                            |
|                    | F-M    | ACGAAGACTTCAAAGACACTTG                              |
|                    | R      | GGAGCTGAAGGACTACTACC                                |
|                    | P      | FAM-CCACATCTTCAGCAGCTCCTCCT-BHQ                     |
| MTRR66<br>(PCR)    | F-W    | CAAAGGCCATCGCAGAAGAAATA                             |
|                    | F-M    | AAGGCCATCGCAGAAGAAATG                               |
|                    | R      | TTCTTCAAAGCACAAAACGGTAA                             |
|                    | P      | FAM-GCTGTGGTACATGGATTTTCTGCAG-BHQ1                  |

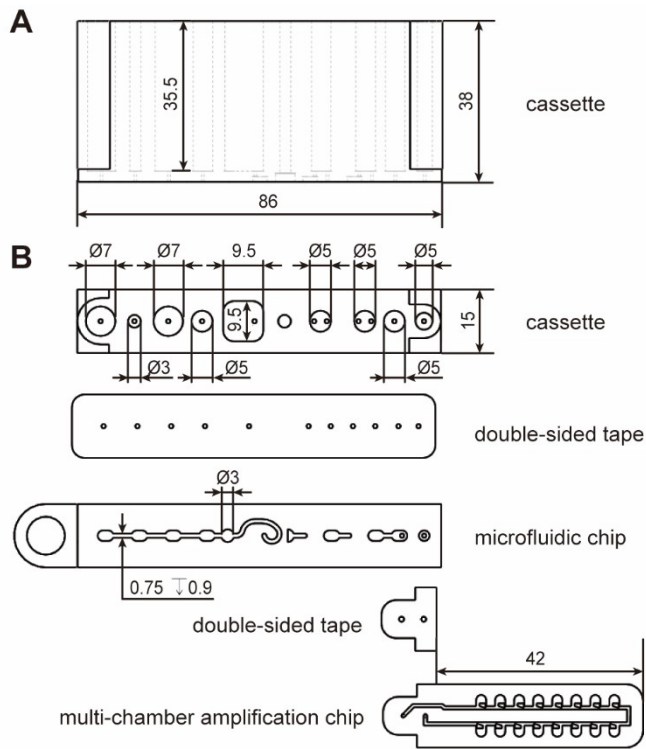

**Figure S1.** Schematic representation of the microfluidic cassette. All the dimensions are shown in millimeters. (A) Side view of the block. (B) Top views of different components of the microfluidic cassette.

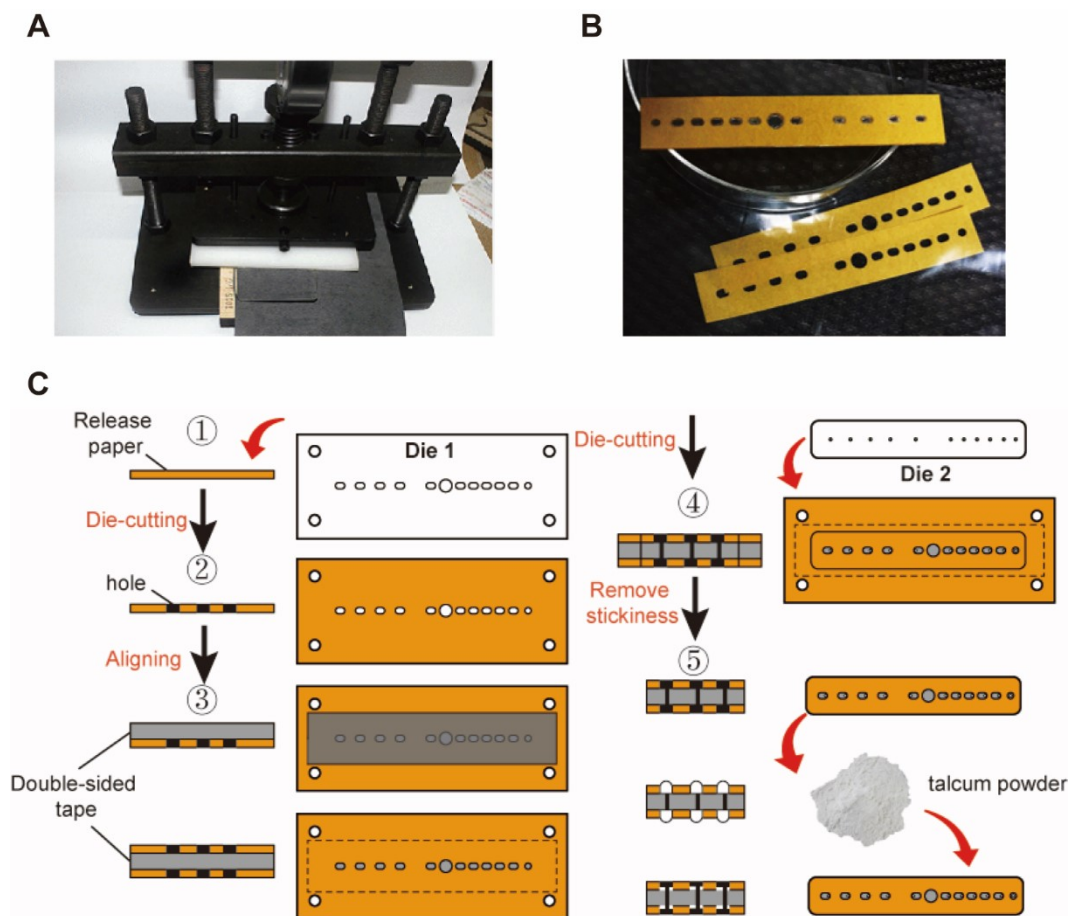

**Figure S2.** The production process of the DS tape. (A) Photo of the die-cutting tool. (B) DS tape with a mask made of release paper. (C) Non-adhesive patterning procedure of the DS tape.

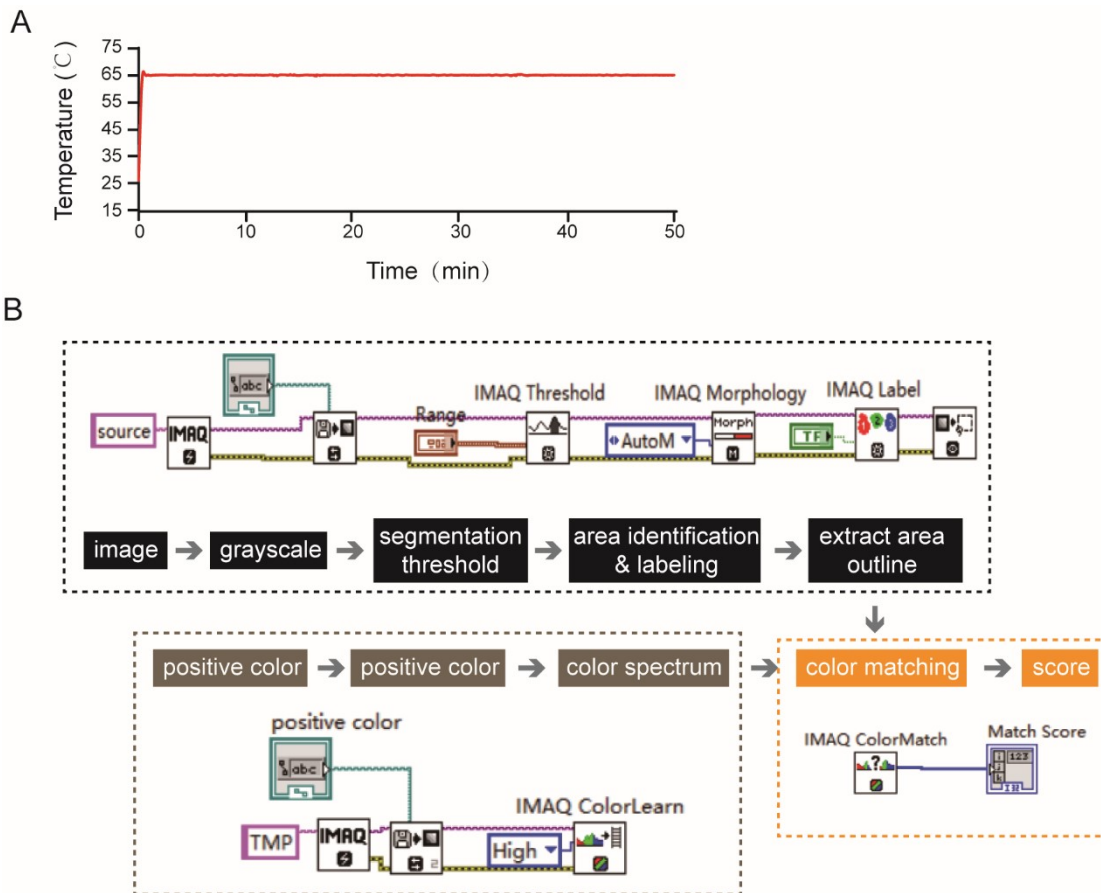

**Figure S3.** Modules used in the nucleic acid analyzer. **(A)** Temperature calibration of the cassette analyzer. **(B)** Photo processing of the reaction results using the LabVIEW software.

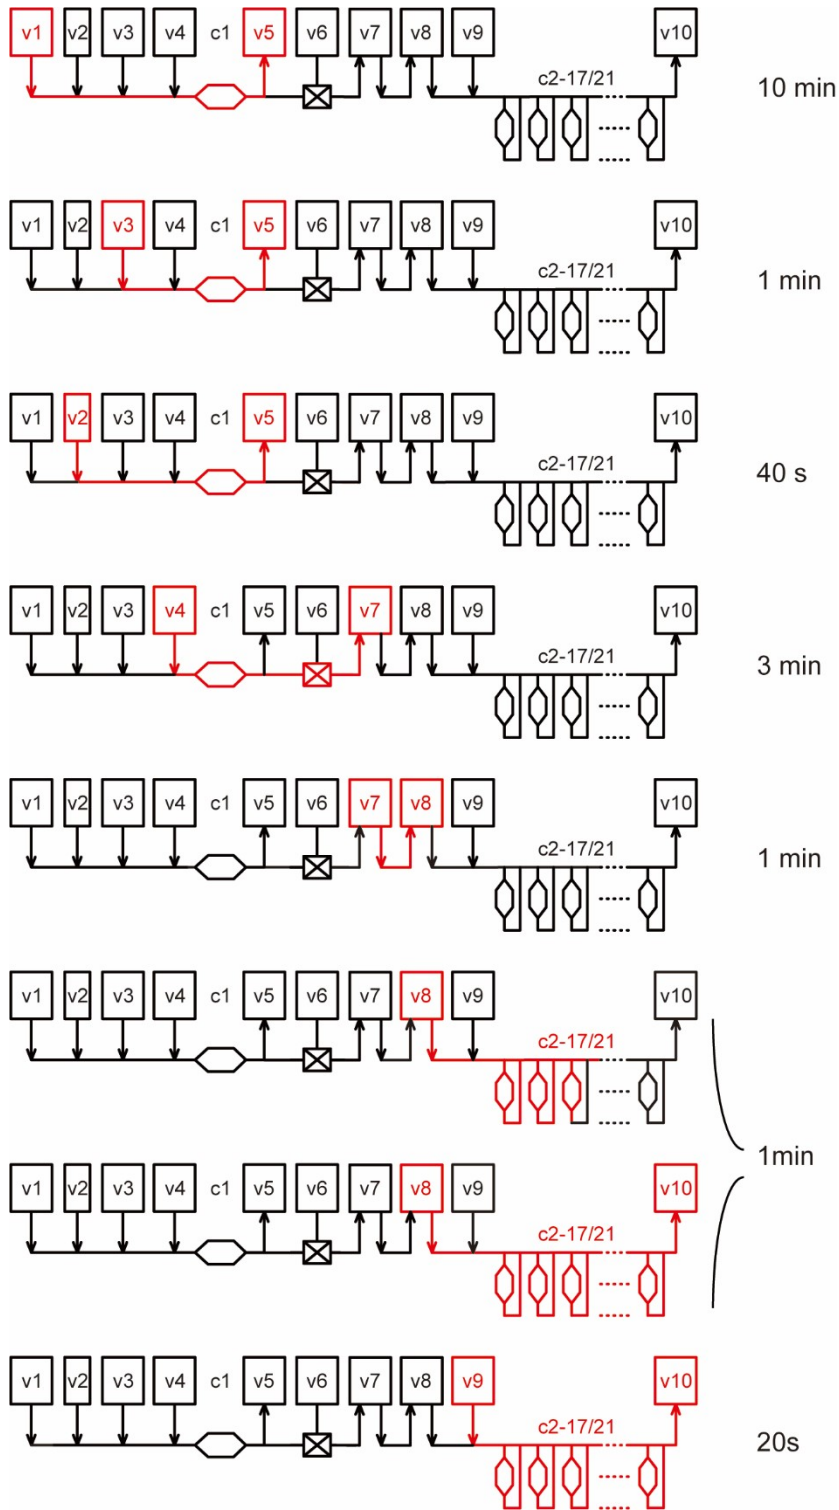

**Figure S4.** Schematic representation of the fluid operation process of the cassette.

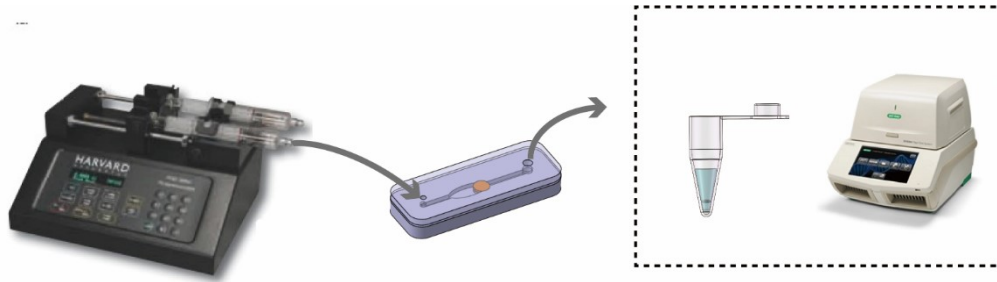

**Figure S5.** Schematic representation of the fluid for nucleic acid extraction with the silica membrane. The syringe pump is connected to the chip through a Teflon tube. The lysis solution, washing solution, air, and eluent flow sequentially through the chip. The eluted DNA is amplified by qPCR.

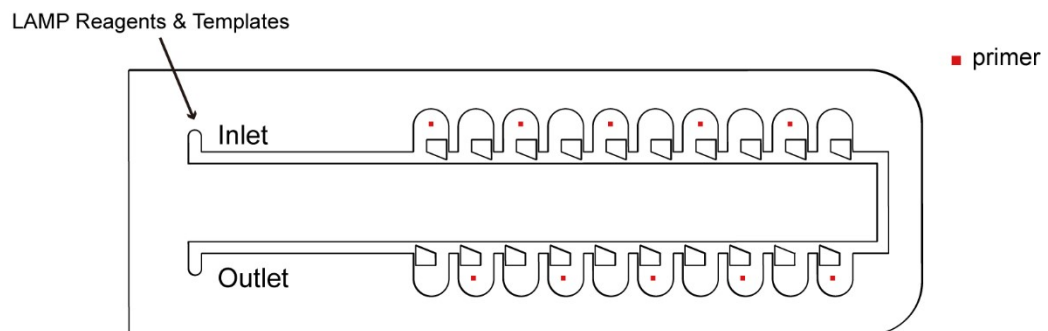

**Figure S6.** Pre-embedding of primers on amplification chips in cross-contamination experiments.

**A**

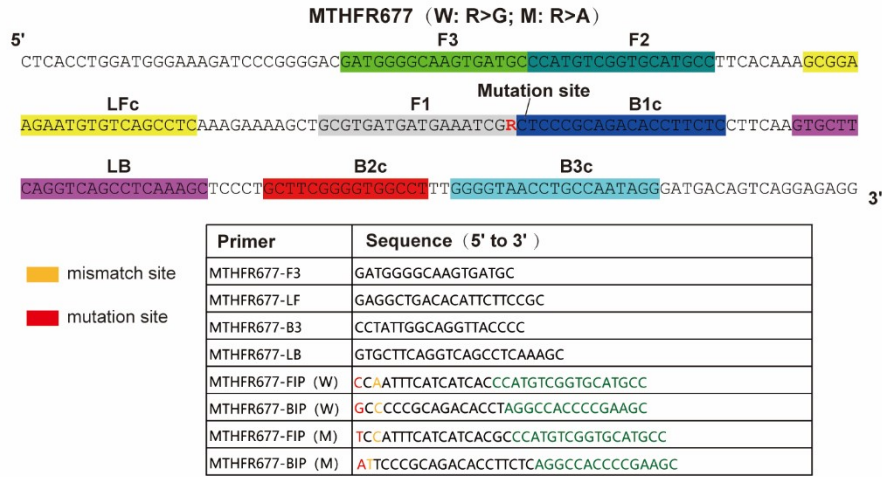

**B**

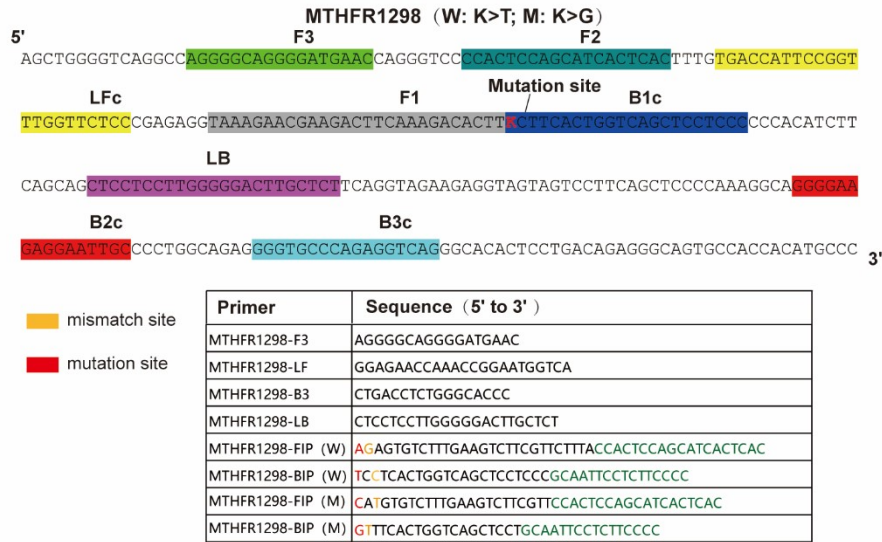

**C**

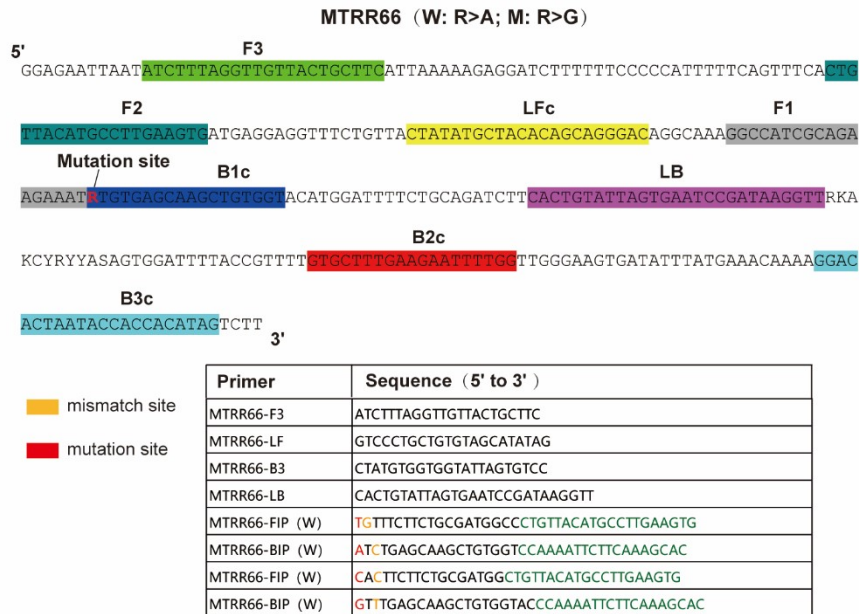

**Figure S7.** Sequences and design principles of the primers used for detecting single nucleotide polymorphisms of genes in folate metabolism. (A) MTHFR677 (W: R>G; M: R>A) (B) MTHFR1298 (W: K>T; M: K>G) (C) MTRR66 (W: R>A; M: R>G)

**A**

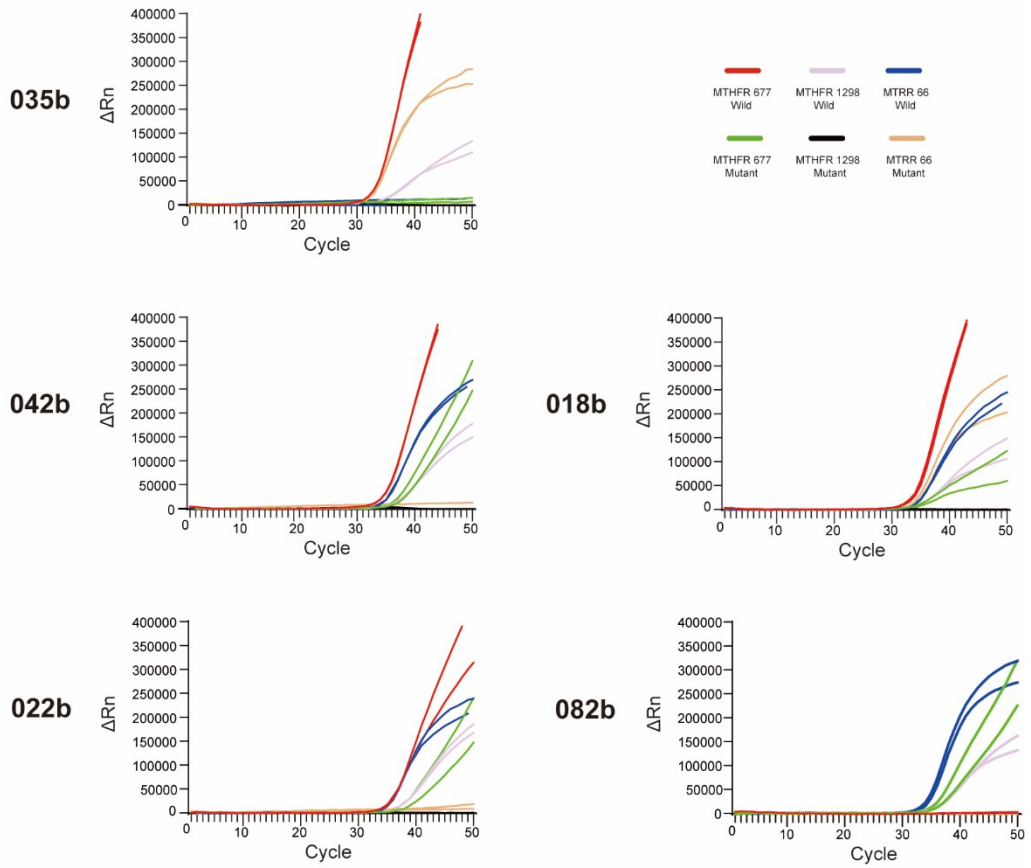

**B**

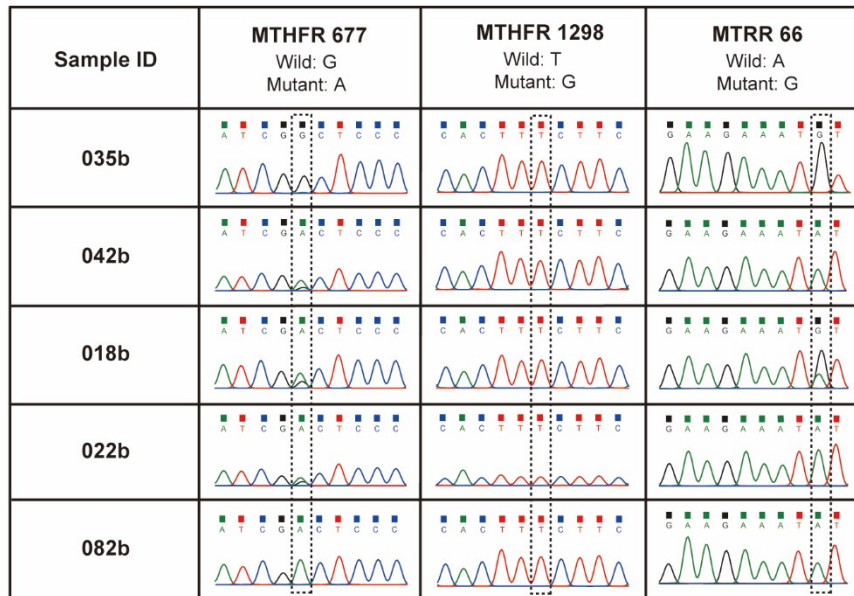

**Figure S8.** A) qPCR and (B) Sequencing results of the 5 clinical samples analyzed.
